# Supplementary material
Source: PubMed Central journal article supplement (PMC6100748)
Supplement: NIHMS984569-supplement-1.pdf [file NIHMS984569-supplement-1.pdf]

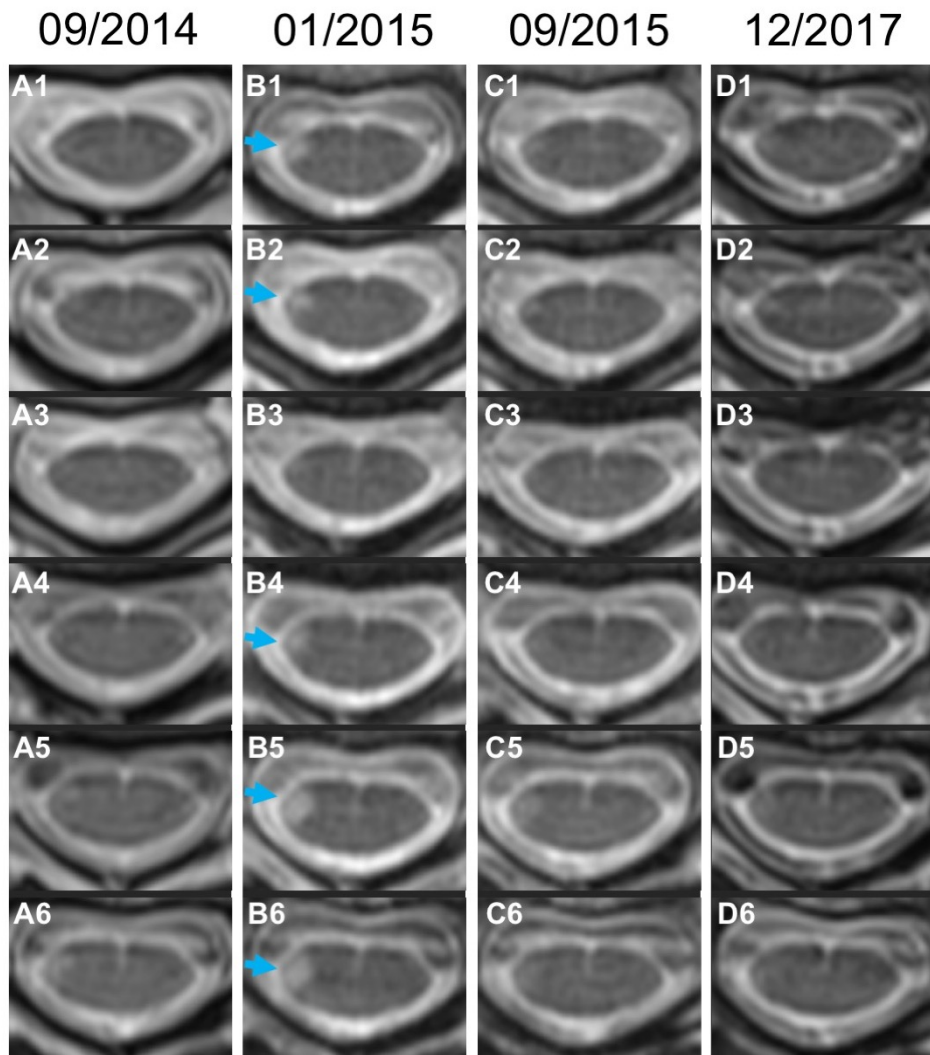

**Supplemental Figure**

Serial (3mm offset) axial T2-weighted MRI images of the cervical cord between cord levels C3 (top) and C4 (bottom) at diagnosis, before and after starting Combivir showing presence of a new lesion at C3 on 01/2015. All imaging was done without gadolinium contrast on 12/2017 due to lack of clinical symptoms.
